# Supplementary material for: Impaired quality of life and diabetic foot disease in Saudi patients with type 2 diabetes: A cross-sectional analysis
Source: PubMed Central journal article supplement — SAGE Open Med. 2019 Feb 21;7:2050312119832092. doi: 10.1177/2050312119832092 (PMC6385329; doi:10.1177/2050312119832092), 2019-02-21
Supplement: Supplementary_Figure.pdf [file Supplementary_Figure.pdf]

(A) Diabetic patient

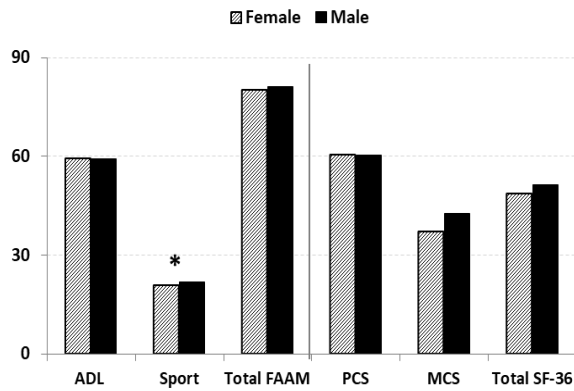

(B) Diabetic foot patients

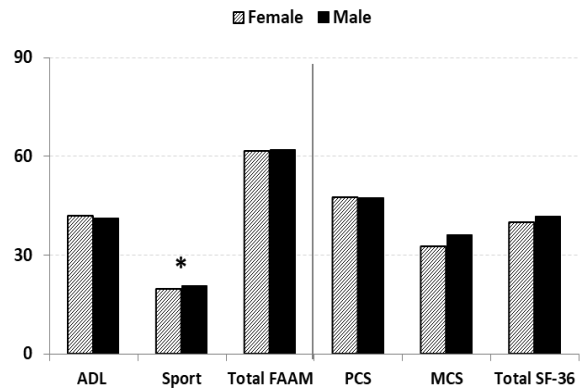

(C) Diabetic patient

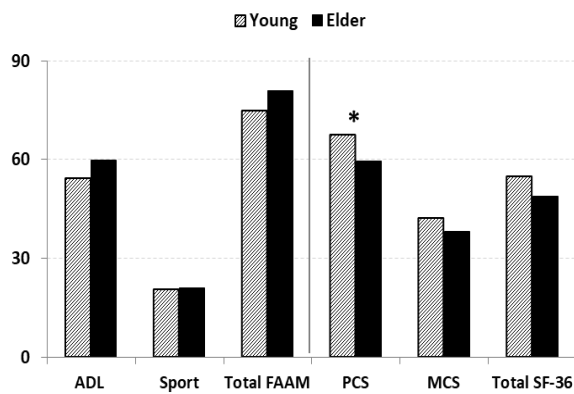

(D) Diabetic foot patients

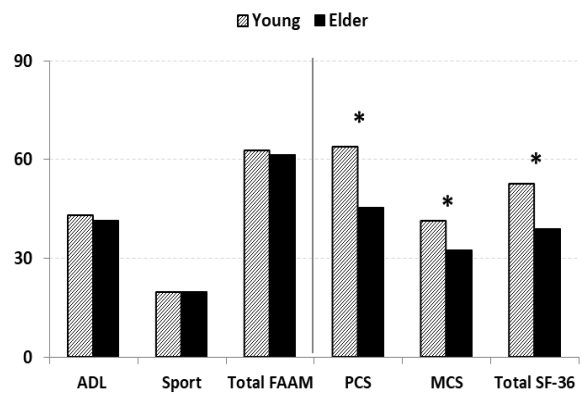

**Supplementary Fig. S1 Gender-specific and age subgroup difference in quality of life assessment.** Mean scores obtained on the FAAM (foot ankle ability measure) and SF-36 (short form 36 questionnaire) subscales were compared between male and female as well as young and elder patients. Student's t test was used for comparison. ADL; activities of daily living, PCS; physical component summary, MCS; mental component summary. \* Indicates significance at  $P < 0.05$ .
